# Supplementary material for: Facile construction of an anthracene-decorated highly luminescent coordination polymer for the selective detection of explosive nitroaromatics and the mutagenic pollutant TNP
Source: Royal Society of Chemistry journal article supplement (doi:10.1039/d3ra06926e), 2024-01-01
Supplement: d3ra06926e1.pdf [file d3ra06926e1.pdf]

**Supporting information for the manuscript entitled**

**Facile construction of anthracene-decorated highly luminescent coordination polymer for selective detection of explosive nitroaromatics and mutagenic pollutant TNP**

Ersad Hossain,<sup>a</sup> Abhijit Hazra,<sup>b,c</sup> Sourav Datta,<sup>b,d</sup> Samim Khan,<sup>d</sup> Samit Pramanik,<sup>a</sup> Priyabrata Banerjee,<sup>\*b,c</sup> Mohammad Hedayetullah Mir<sup>\*d</sup> and Subrata Mukhopadhyay<sup>a</sup>

<sup>a</sup>*Department of Chemistry, Jadavpur University, Kolkata 700 032, India.*

<sup>b</sup>*Electric Mobility & Tribology Research Group, CSIR-Central Mechanical Engineering Research Institute, Mahatma Gandhi Avenue, Durgapur 713 209, India.*

<sup>c</sup>*Academy of Scientific and Innovative Research (AcSIR), Ghaziabad 201 002, India.*

<sup>d</sup>*Department of Chemistry, Aliah University, New Town, Kolkata 700 160, India.*

To whom correspondence should be addressed. E-mails: [pr\\_banerjee@cmeri.res.in](mailto:pr_banerjee@cmeri.res.in) (P. B) and [chmmir@gmail.com](mailto:chmmir@gmail.com) (M. H. M.)

**Table S1** Crystal data and refinement parameters for compound **1**.

|                                                      |                                                                  |
|------------------------------------------------------|------------------------------------------------------------------|
| Formula                                              | C <sub>50</sub> H <sub>36</sub> N <sub>2</sub> O <sub>5</sub> Zn |
| fw                                                   | 810.20                                                           |
| cryst syst                                           | Triclinic                                                        |
| space group                                          | $P\bar{1}$                                                       |
| <i>a</i> (Å)                                         | 6.011(3)                                                         |
| <i>b</i> (Å)                                         | 15.789(8)                                                        |
| <i>c</i> (Å)                                         | 21.392(11)                                                       |
| $\alpha$ (deg)                                       | 73.242(6)                                                        |
| $\beta$ (deg)                                        | 83.793(7)                                                        |
| $\gamma$ (deg)                                       | 86.176(6)                                                        |
| <i>V</i> (Å <sup>3</sup> )                           | 1931.3(17)                                                       |
| <i>Z</i>                                             | 2                                                                |
| <i>D</i> <sub>calcd</sub> (g/cm <sup>3</sup> )       | 1.393                                                            |
| $\mu$ (mm <sup>-1</sup> )                            | 0.690                                                            |
| <i>F</i> (000)                                       | 840.0                                                            |
| $\lambda$ (Å)                                        | 0.71073                                                          |
| GOF on <i>F</i> <sup>2</sup>                         | 1.032                                                            |
| Final <i>R</i> indices                               | <i>R</i> 1 = 0409                                                |
| [ <i>I</i> > 2 $\sigma$ ( <i>I</i> )] <sup>a,b</sup> | <i>wR</i> 2 = 0967                                               |
| Temperature(K)                                       | 293                                                              |

$${}^a R1 = \sum ||F_o| - |F_c|| / \sum |F_o|, {}^b wR2 = [\sum w(F_o^2 - F_c^2)^2 / \sum w(F_o^2)^2]^{1/2}$$

**Table S2** Selected bond lengths and bond angles **1**.

| <b>Bond length (Å)</b> |            |
|------------------------|------------|
| Zn(1)-N(1)             | 2.189(3)   |
| Zn(1)-N(2)             | 2.224(3)   |
| Zn(1)-O(1)             | 2.132(3)   |
| Zn(1)-O(2)             | 2.287(3)   |
| Zn(1)-O(3)             | 2.004(3)   |
| Zn(1)-O(5)             | 2.049(3)   |
| <b>Bond angle (°)</b>  |            |
| N(1)-Zn(1)-N(2)        | 176.02(11) |
| N(1)-Zn(1)-O(1)        | 93.35(11)  |
| N(1)-Zn(1)-O(2)        | 90.40(10)  |
| N(1)-Zn(1)-O(3)        | 87.40(11)  |
| N(1)-Zn(1)-O(5)        | 88.91(12)  |
| N(2)-Zn(1)-O(1)        | 90.63(11)  |
| N(2)-Zn(1)-O(2)        | 91.53(11)  |
| N(2)-Zn(1)-O(3)        | 88.66(11)  |
| N(2)-Zn(1)-O(5)        | 91.10(12)  |
| O(1)-Zn(1)-O(2)        | 59.10(8)   |
| O(1)-Zn(1)-O(3)        | 170.86(15) |
| O(1)-Zn(1)-O(5)        | 91.79(12)  |
| O(2)-Zn(1)-O(3)        | 111.81(14) |
| O(2)-Zn(1)-O(5)        | 150.79(12) |
| O(3)-Zn(1)-O(5)        | 97.33(10)  |

**Table S3** Hydrogen bonding in compound **1**.

| D—H···A          | Distance (Å)<br>D—H | Distance (Å)<br>H···A | Distance (Å)<br>D···A | Angle (°)<br>∠D—H···A |
|------------------|---------------------|-----------------------|-----------------------|-----------------------|
| O(5)-H(5)···O(4) | 0.853               | 1.813(2)              | 2.612(3)              | 155.0(1)              |
| O(5)-H(5)···O(2) | 0.787               | 1.92(3)               | 2.694(3)              | 167(3)                |

**Table S4** Geometric features (distances, Å and angles,°) of the  $\pi\cdots\pi$  stacking interactions in compound **1**.

| Compound | Cg(Ring I)···Cg(Ring J) | Cg···Cg<br>(Å) | Cg(I)···Perp<br>(Å) | Cg(J)···Perp<br>(Å) |
|----------|-------------------------|----------------|---------------------|---------------------|
| <b>1</b> | Cg(4)···Cg(5)           | 3.664(3)       | 3.648               | 3.648               |
|          | Cg(9)···Cg(10)          | 3.629(3)       | 3.602               | 3.591               |

Cg(I)···Perp = Perpendicular distance of Cg(I) on ring J. Cg(J)···Perp = Perpendicular distance of Cg(J) on ring I.

For Compound **1**:

Cg(4) = Centre of gravity of the ring [C(9)-C(10)-C(11)-C(12)-C(13)-C(14)];

Cg(5) = Centre of gravity of the ring [C(16)-C(17)-C(18)-C(19)-C(20)-C(21)].

Cg(9) = Centre of gravity of the ring[C(38)-C(39)-C(40)-C(41)-C(42)-C(43)].

Cg(10) = Centre of gravity of the ring[C(45)-C(46)-C(47)-C(48)-C(49)-C(50)].

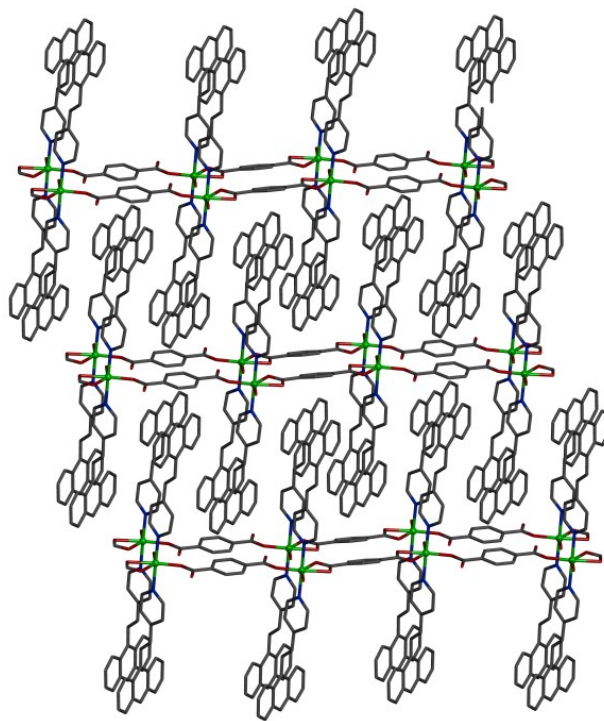

**Fig. S1** 3D supramolecular architecture of CP **1** based on  $\pi \cdots \pi$  and hydrogen bonding interactions.

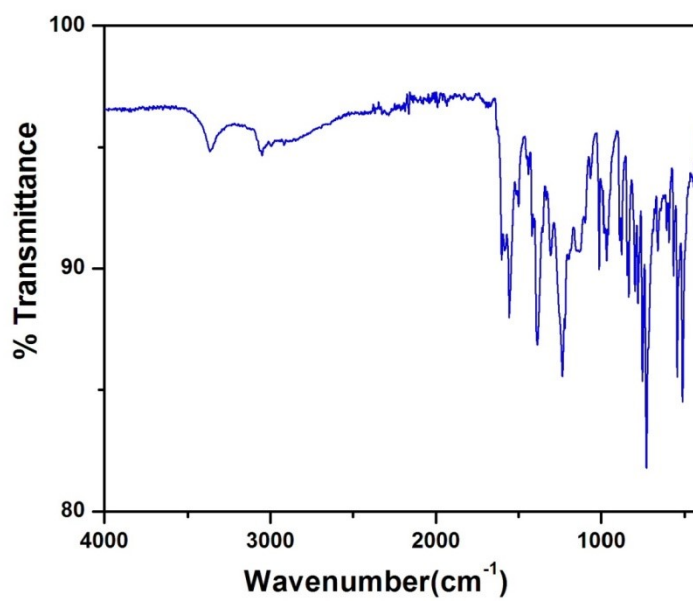

**Fig. S2** IR spectrum of CP **1**.

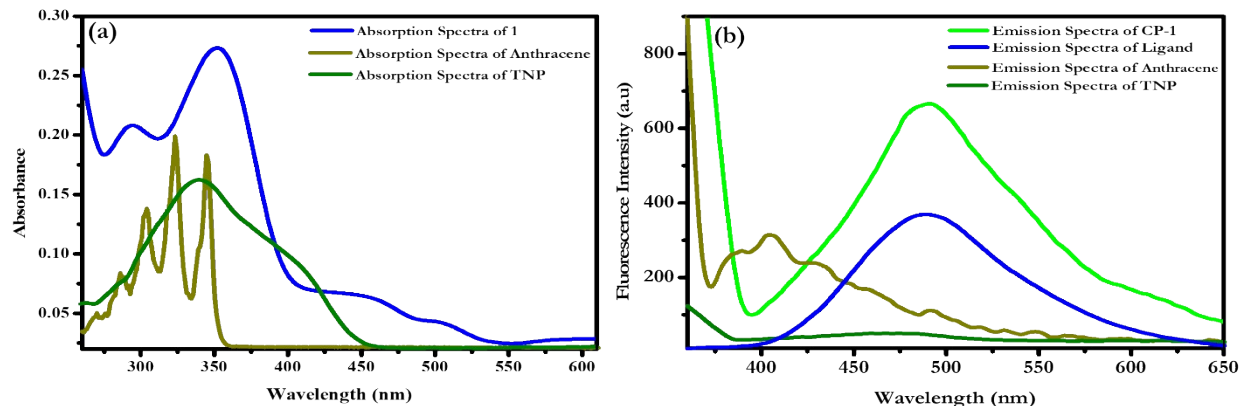

**Fig. S3** (a) Absorption spectra and (b) Emission spectra of CP 1, anthracene ( $10^{-4}$ M CAN solution), TNP ( $10^{-4}$ M ACN solution) and free avp ligand ( $10^{-4}$ M ACN solution).

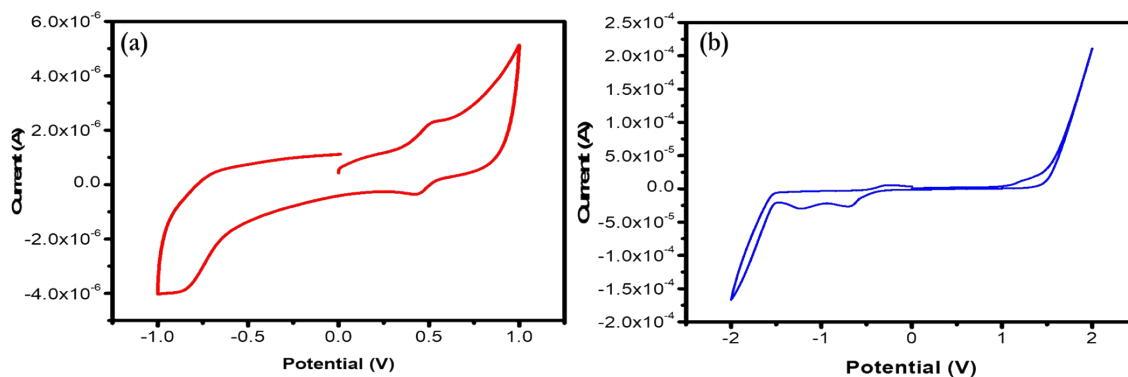

**Fig. S4** Cyclic voltammogram (a) avp ligand and (b) H<sub>2</sub>bdc.

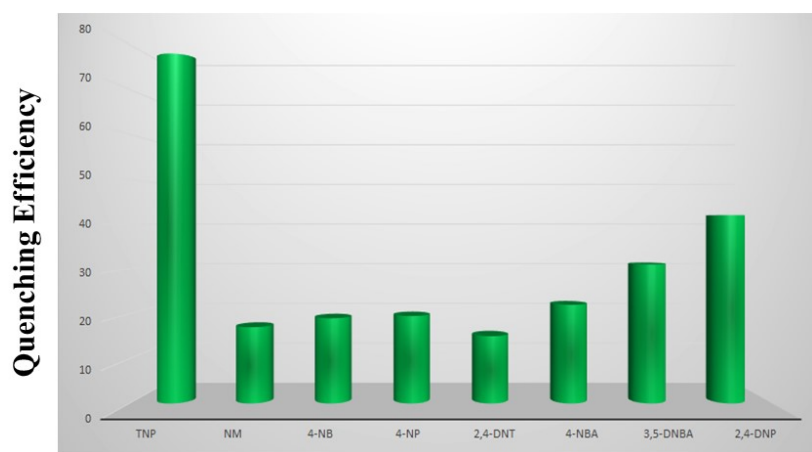

**Fig. S5** Quenching efficiency of epNACs towards the fluorescence intensity of CP 1.

### Calculation of detection limit

The detection limit calculated as per the standard reported method. For calculating detection limit, TNP (0-850 $\mu$ l,  $1 \times 10^{-4}$  M stock solution) was added to CPs solutions and respective fluorescence intensity was recorded. By plotting fluorescence intensity with increasing equivalent concentration of TNP, slope (k) of graph was found and Standard deviation ( $\sigma$ ) was calculated from five blank measurements of CPs. Detection limit is calculated according to the formula: detection limit= $(3\sigma/k)$ .

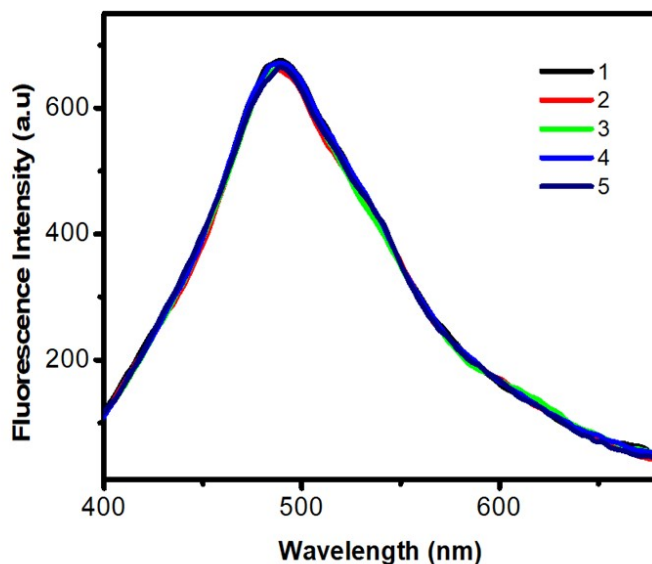

Fig. S6 Plot of blank titration of CP 1.

Table S5 Standard deviation of CP 1

| BlankReadings                                  | FluorescenceIntensity |
|------------------------------------------------|-----------------------|
| 1                                              | 675                   |
| 2                                              | 659                   |
| 3                                              | 667                   |
| 4                                              | 670                   |
| 5                                              | 664                   |
| <b>Standard Deviation(<math>\sigma</math>)</b> | <b>5.40</b>           |

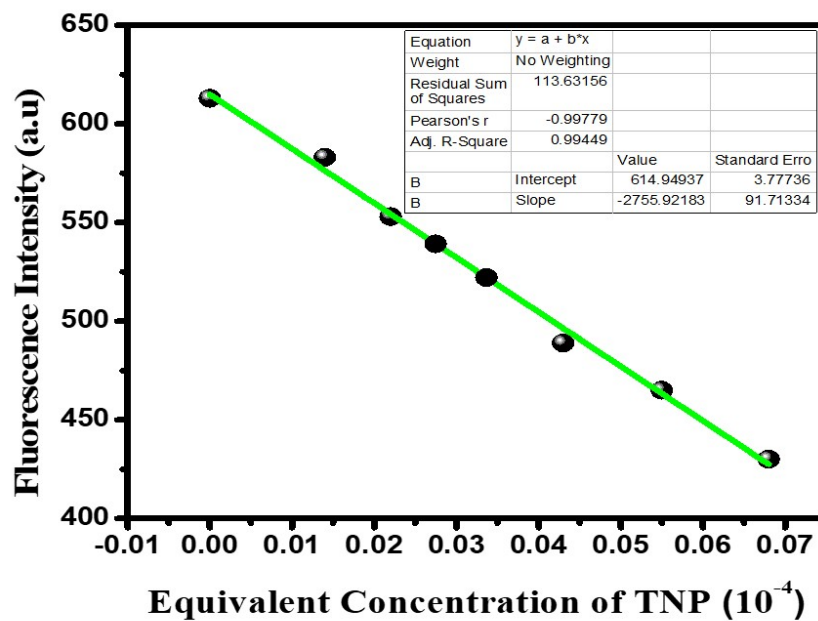

**Fig. S7** Linear region of fluorescence intensity of CP 1 upon addition of TNP ( $10^{-4}$  M ACN) solution

$$\text{Slope (k)} = 2755.92$$

$$\text{Standard Deviation } (\sigma) = 5.40$$

$$\text{Detection limit } (3\sigma/k) = 0.58 \mu\text{M}$$

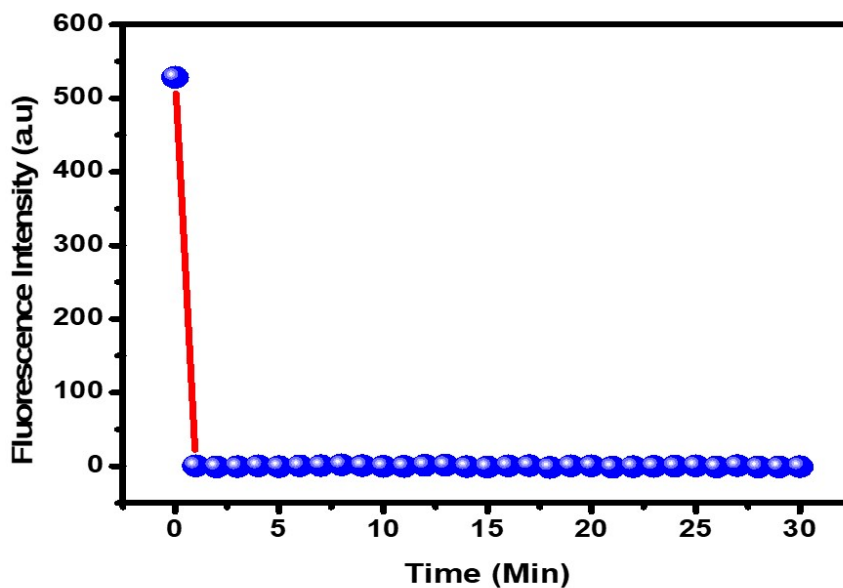

**Fig. S8** Time dependent fluorescence response of the sensor probe CP 1 in presence of TNP solution.



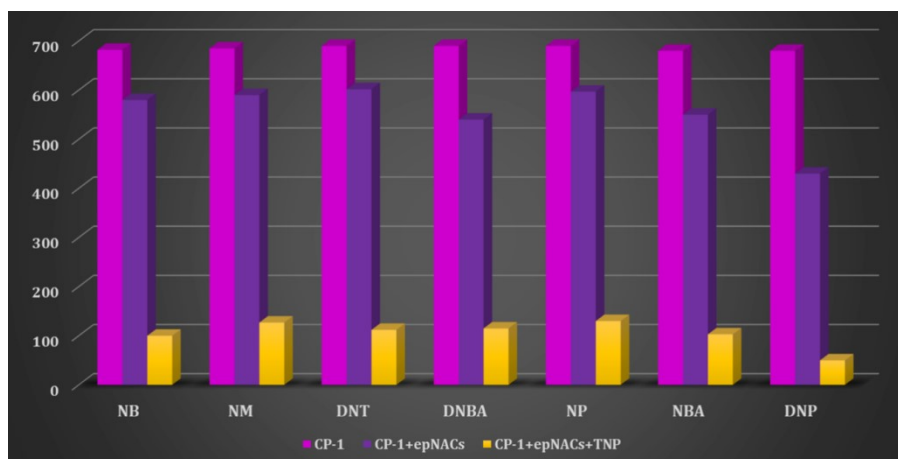

Fig. S9 Selectivity of CP 1 for TNP in presence of other epNACs.

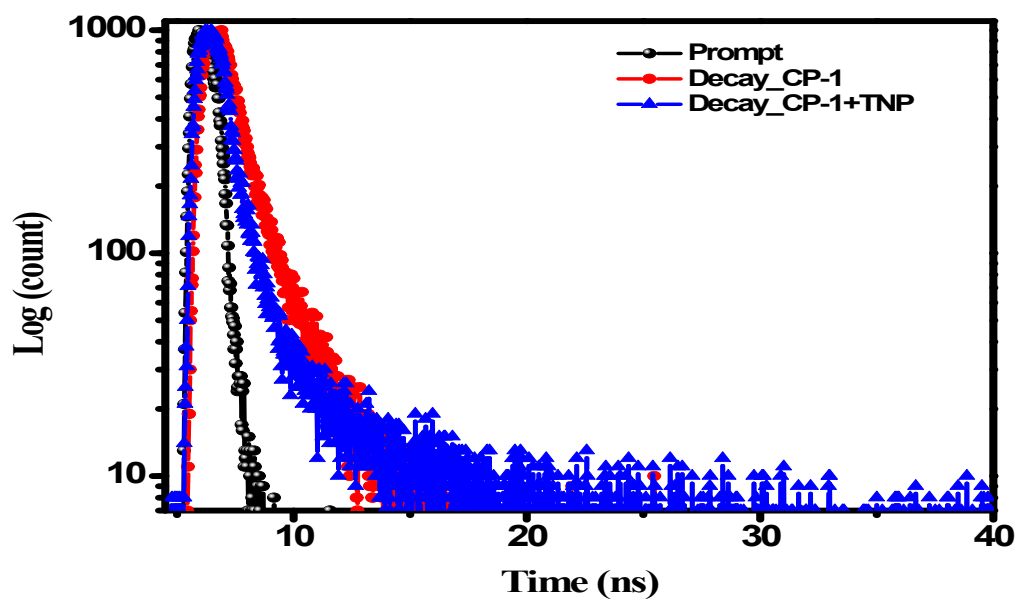

Fig. S10 Fluorescence lifetime decay profiles of CP 1 without and with TNP.

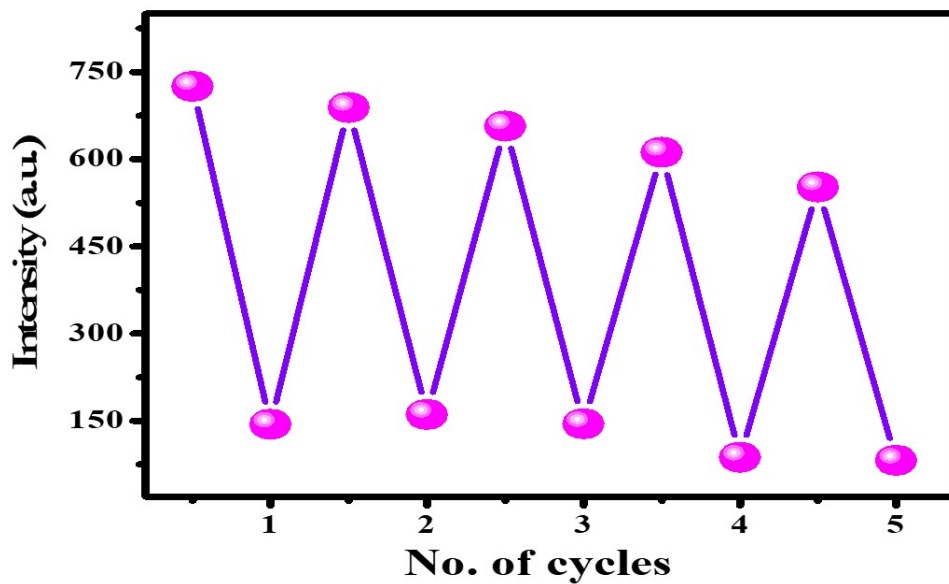

**Fig. S11** Recyclability of CP 1 for luminescent quenching with TNP up to 5 times.

### **FESEM**

The high-resolution images CP 1 captured by the FESEM revealed elongated, slender crystals resembling needles like morphology (Fig. S12a). These crystals exhibited a distinct and uniform shape (Fig. S12b) with pointed end (Fig. S12c) and a consistent width along with the length. Further resolution enabled to closely observe the fine details of the needle-shaped crystals, such as its surface features and structural nuances. The surface structural feature indicates significant smoothness (Fig. S12d), which further suggests minimal surface irregularities and the feasibility of structural homogeneity. This detailed visualization of the crystal morphology provides a comprehensive understanding of the dimension of the crystal (Fig. 5d), orientation, and potential structural homogeneity.

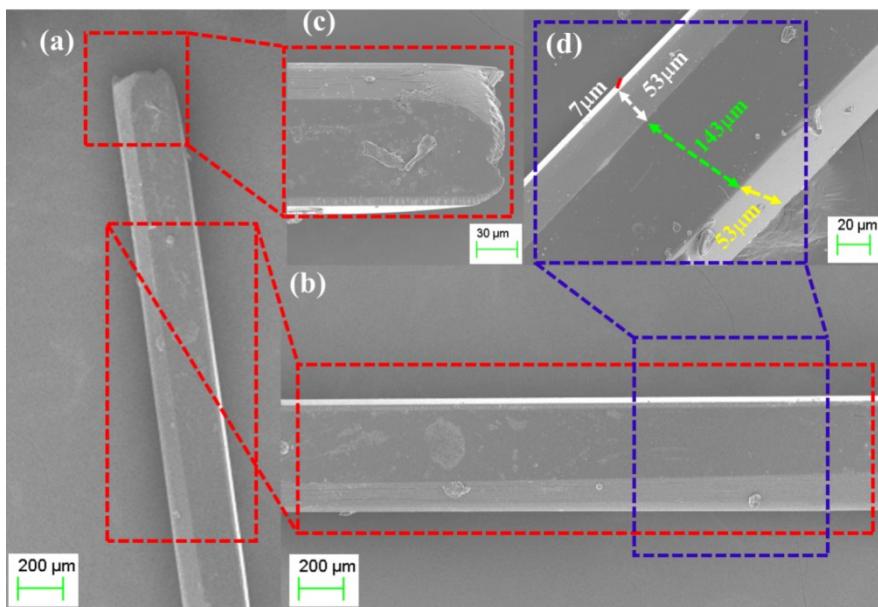

**Fig. S12** FE-SEM of the luminescent probe CP 1 with different elongated section to observe its surface features.

**Table S6** Comparison table with recently reported similar works

| Sl. No. | Compound                                        | Parameters            |                       | Recyclability | Reference |
|---------|-------------------------------------------------|-----------------------|-----------------------|---------------|-----------|
|         |                                                 | LOD (M)               | $K_{sv}$ ( $M^{-1}$ ) |               |           |
| 1.      | $[Cd(L_{12})(L_{13})]_n$                        | $0.27 \times 10^{-6}$ | $2.68 \times 10^4$    | Yes           | 1         |
| 2.      | $[Cd_5(TCA)_4(H_2O)_2]$                         | $6.2 \times 10^{-6}$  | $6.56 \times 10^4$    | No            | 2         |
| 3.      | $\{[Cd_4(L)_2(L_2)_3(H_2O)_2](8DMF)(8H_2O)\}_n$ | $4.9 \times 10^{-6}$  | $3.89 \times 10^4$    | No            | 3         |
| 4.      | $[Cd_4(\mu_3-O)(TTHA)(H_2O)_2] \cdot 3H_2O$     | $5.6 \times 10^{-6}$  | $3.83 \times 10^4$    |               | 4         |
| 5.      | $[Cd(L_6)(L_7)]_2 \cdot H_2O$                   | NA                    | $3.7 \times 10^4$     | Yes           | 5         |
| 6.      | $[Cd_3(TPT)_2(DMF)_2] \cdot (H_2O)_{0.5}$       | $7.8 \times 10^{-6}$  | $6.56 \times 10^4$    | Yes           | 6         |
| 7.      | $[Zn_3(TPT)_2(DMF)_2] \cdot 0.5HNMe_2$          | NA                    | $6.39 \times 10^4$    | Yes           | 7         |
| 8.      | $NH_2Me_2 \cdot [Zn(TPT)] \cdot DMF$            | NA                    | $7.18 \times 10^4$    |               |           |
| 9.      | $[Me_2NH_2]_4[Zn_6(qptc)_3(trz)_4] \cdot 6H_2O$ | NA                    | $2.08 \times 10^6$    | Yes           | 8         |

|     |                                                                                                          |                                                                                                  |                                                                                      |     |    |
|-----|----------------------------------------------------------------------------------------------------------|--------------------------------------------------------------------------------------------------|--------------------------------------------------------------------------------------|-----|----|
| 10. | $Zn_2(TZBPDC)(\mu_3-OH)(H_2O)_2$                                                                         | $2.78 \times 10^{-4}$                                                                            | $4.9 \times 10^4$                                                                    | No  | 9  |
| 11. | $[Mg_2Zn_2(OH)_2(1,4-NDC)_3(H_2O)_2] \cdot 6H_2O$                                                        | NA                                                                                               | $1.8 \times 10^4$                                                                    | No  | 10 |
| 12. | $[Zn_2(NH_2BDC)_2(L_{15})]_n$                                                                            | $1.31 \times 10^{-6}$                                                                            | NA                                                                                   | No  | 11 |
| 13. | $[Zn_8(ad)_4(BPDC)_6O \cdot 2 Me_2NH_2] \cdot G$                                                         | $12.9 \times 10^{-9}$                                                                            | $4.6 \times 10^4$                                                                    | No  | 12 |
| 14. | $[(CH_3)_2NH_2]_3[Zn_4Na(L_8)_3] \cdot 4CH_3OH \cdot 2 DMF$                                              | $5 \times 10^{-6}$                                                                               | $3.2 \times 10^4$                                                                    | No  | 13 |
| 15. | $[Zn_4(DMF)(urotropine)_2(L_4)_4]$                                                                       | $7.1 \times 10^{-6}$                                                                             | $10.83 \times 10^4$                                                                  | No  | 14 |
|     | <b>AIE active material</b>                                                                               |                                                                                                  |                                                                                      |     |    |
| 16. | 4-((pyren-1-yl)methyleneamino)-1,2-dihydro-2,3-dimethyl-1-phenylpyrazol-5-one                            | $16.51 \times 10^{-9}$                                                                           | $4.7 \times 10^5$                                                                    | No  | 15 |
| 17. | dimethyl-5-(pyren-1-ylmethyleneamino)isophthalate                                                        | $10 \times 10^{-9}$                                                                              | $2.03 \times 10^4$                                                                   | No  | 16 |
| 18. | polyPhTPECz                                                                                              | $3.8 \times 10^{-9}$                                                                             | $1.63 \times 10^5$                                                                   | Yes | 17 |
| 19. | phosphorescent cyclometalated iridium(III) complexes<br>complex 1<br>complex 2<br>complex 3<br>complex 4 | $0.23 \times 10^{-6}$<br>$0.15 \times 10^{-6}$<br>$1.05 \times 10^{-6}$<br>$1.65 \times 10^{-6}$ | $1.50 \times 10^5$<br>$0.32 \times 10^5$<br>$1.66 \times 10^5$<br>$0.86 \times 10^5$ | No  | 18 |
| 20. | Tetraphenylethene (TPE) incorporated into a UiO-isoreticular zirconium MOF                               | ----                                                                                             | ----                                                                                 | No  | 19 |
|     | <b>Conjugated polymers</b>                                                                               |                                                                                                  |                                                                                      |     |    |
| 21. | 4'-(4-{2-[aryl]-ethenyl}phenyl)2,2':6',2''-terpyridines                                                  | 1.31–<br>$2.94 \times 10^{-7}$                                                                   | $\sim 10^4$                                                                          | No  | 20 |
| 22. | CP 1,<br>CP 2,<br>CP 3                                                                                   | $3.2 \times 10^{-12}$<br>$5.7 \times 10^{-12}$<br>$6.1 \times 10^{-12}$                          | $4.27 \times 10^6$ ,<br>$3.71 \times 10^6$ ,<br>$2.13 \times 10^6$                   | No  | 21 |
| 23. | poly(tetraphenylethene-co-biphenyl) (PTPEBP) nanoparticles                                               | $1.07 \times 10^{-6}$                                                                            | $2.50 \times 10^4$                                                                   | No  | 22 |
| 24. | 1,1,2,2-tetrakis(4-formyl-(1,10-biphenyl))-ethane (TFBE)                                                 | $0.09 \times 10^{-6}$                                                                            | $8 \times 10^5$                                                                      | No  | 23 |
| 25. | Fluorescein containing conjugated                                                                        | $7.22 \times 10^{-7}$                                                                            | $2.08 \times 10^3$                                                                   | No  | 24 |

|     |                                               |                         |                     |            |                     |
|-----|-----------------------------------------------|-------------------------|---------------------|------------|---------------------|
|     | microporous polymers (DTF and TTF)            |                         |                     |            |                     |
| 26. | <b>Quantum dots</b>                           |                         |                     |            |                     |
| 27. | N-CDs@MIP                                     | $0.15 \times 10^{-9}$   | $73.5 \times 10^9$  | No         | 25                  |
| 28. | Oxygen containing CDs                         | $0.0620 \times 10^{-6}$ | ----                | No         | 26                  |
| 29. | ZnSe quantum dots                             | $12.4 \times 10^{-6}$   | -----               | No         | 27                  |
| 30. | MoS <sub>2</sub> quantum dots (QDs)           | $95 \times 10^{-9}$     | $4.3 \times 10^4$   | No         | 28                  |
| 31. | Nitrogen doped graphene quantum dots (N-GQDs) | $0.92 \times 10^{-6}$   | ----                | No         | 29                  |
| 32. | <b>CP 1</b>                                   | $0.58 \times 10^{-6}$   | $18.18 \times 10^4$ | <b>Yes</b> | <b>Present work</b> |

trz = 1,2,4- triazole; 1,4-H<sub>2</sub>NDC = 1,4-naphthalenedicarboxylic acid; H<sub>4</sub>qptc = terphenyl-2,5,2'5'-tetracarboxylic acid; L<sub>1</sub> = 4-amino-3,5-bis(4-imidazol-1-ylphenyl)-1,2,4-triazole; H<sub>6</sub>TDPAT = 2,4,6-tris(3,5-dicarboxylphenylamino)-1,3,5-triazine; Hbpba = 4-(bis(4-(pyridin-4-yl)phenyl)amino)benzoic acid; 4-tp-3-lad = 2,3,5,6-tetra(pyridin-4-yl)-bicyclo[2.2.0]hexane; 1,4-H<sub>2</sub>BDC = benzene-1,4-dicarboxylic acid; ppene = 4-pyrpopy-2-ene; H<sub>3</sub>TZBPDC = 4'-(1Htetrazol-5-yl)-[1,1'-biphenyl]-3,5-dicarboxylic acid; H<sub>3</sub>TPT = p-terphenyl-3,4",5-tricarboxylic acid; apy = aminopyridine; H<sub>4</sub>tptc = terphenyl-3,3",5,5"-tetracarboxylic acid; Ur = urotropin; py = pyridine; TNP= 2,4,6-trinitrophenol.

## References

1. Y. Rachuri, B. Parmar, K. K. Bisht and E. Suresh, *Dalton Trans.*, 2016, **45**, 7881-7892.
2. M. Venkateswarulu, A. Pramanik and R. R. Koner, *Dalton Trans.*, 2015, **44**, 6348-6352.
3. T. K. Pal, N. Chatterjee and P. K. Bharadwaj, *Inorg. Chem.*, 2016, **55**, 1741-1747.
4. S. Li, J. Song, J. C. Ni, Z. N. Wang, X. Gao, Z. Shi, F. Y. Baia and Y. H. Xing, *RSC Adv.*, 2016, **6**, 36000-36010.
5. B. Q. Song, C. Qin, Y. T. Zhang, X. S. Wu, L. Yang, K. Z. Shao and Z. M. Su, *Dalton Trans.*, 2015, **44**, 18386-18394.
6. C. Zhang, L. Sun, Y. Yan, J. Li, X. Song, Y. Liu and Z. Liang, *Dalton Trans.*, 2015, **44**, 230-236.
7. C. Zhang, Y. Yan, L. Sun, Z. Liang and J. Li, *CrystEngComm*, 2016, **18**, 4102-4108.
8. X.-X. Jia, R.-X. Yao, F.-Q. Zhang and X.-M. Zhang, *Inorg. Chem.*, 2017, **56**, 2690-2696
9. Y. Hu, M. Ding, X.-Q. Liu, L.-B. Sun and H.-L. Jiang, *Chem. Commun.*, 2016, **52**, 5734-5737.

10. Z.-F. Wu and X.-Y. Huang, *Dalton Trans.*, 2017, **46**, 12597-12604.
11. S. S. Dhankhar, N. Sharma, S. Kumar, T. J. D. Kumar and C. M. Nagaraja, *Chem. Eur. J.*, 2017, **23**, 16204-16212.
12. B. Joarder, A. V. Desai, P. Samanta, S. Mukherjee and S. K. Ghosh, *Chem. Eur. J.*, 2015, **21**, 965-969.
13. E. L. Zhou, P. Huang, C. Qin, K. Z. Shao and Z. M. Su, *J. Mater. Chem. A*, 2015, **3**, 7224-7228.
14. S. Mukherjee, A. V. Desai, B. Manna, A. I. Inamdar and S. K. Ghosh, *Cryst. Growth Des.*, 2015, **15**, 4627-4634.
15. M. Shyamal, S. Maity, P. Mazumdar, G.P. Sahoo, R. Maity and A. Misra, *J. Photochem. Photobiol. A*, 2017, **342**, 1-14.
16. A. Panigrahi, B. P. Sahu, S. Mandani, D. Nayak, S. Giri and T. K. Sarma, *J. Photochem. Photobiol. A*, 2019, **374**, 194-205.
17. H. Hao, C. Xu, H. Luo, J. Yang, C. Liu, B. Xu, G. Shi, X. Xing and Z. Chi, *Mater. Chem. Front.*, 2021, **5**, 492-499.
18. W. Che, G. Li, X. Liu, K. Shao, D. Zhu, Z. Su and M. R. Bryce, *Chem. Commun.*, 2018, **54**, 1730-1733.
19. Q. Y. Li, Z. Ma, W. Q. Zhang, J. L. Xu, W. Wei, H. Lu, X. Zhao and X. J. Wang, *Chem. Commun.*, 2016, **52**, 11284-11287.
20. A. Sil, D. Giri and S. K. Patra, *J. Mater. Chem. C*, 2017, **5**, 11100-11110.
21. R. Batool, N. Riaz, H. M. Junaid, M. T. Waseem, Z. A. Khan, S. Nawazish, U. Farooq, C. Yu and S. A. Shahzad, *ACS omega*, 2021, **7**, 1057-1070.
22. S. Li, T. Ouyang, X. Guo, W. Dong, Z. Ma and T. Fei, *Mater.*, 2023, **16(19)**, 6458.
23. S. Jiang, L. Meng, W. Ma, Q. Qi, W. Zhang, B. Xu, L. Liu and W. Tian, *Chin. Chem. Lett.*, 2021, **32**, 1037-1040.
24. T.M. Geng, S. N. Ye, Y. Wang, H. Zhu, X. Wang and X. Liu, *Talanta*, 2017, **165**, 282-288.
25. K. Murugan, V. K. Jothi, A. Rajaram and A. Natarajan, *ACS omega*, 2021, **7**, 1368-1379.
26. S. Kadian, A. Kalkal, V. Jain, S. Shukla and R. J. Narayan, *MRS Commun.*, 2023, **13**, 885-891.
27. V. Sharma and M. S. Mehata, *Spectrochim. Acta A*, 2021, **260**, 119937.

28. Y. Wang and Y. Ni, *Anal. Chem.*, 2014, **86(15)**, 7463-7470.
29. M. Kaur, S. K. Mehta and S. K. Kansal, *Spectrochim. Acta A*, 2017, **180**, 37-43.
